# Effect of Handedness on Learned Controllers and Sensorimotor Noise During Trajectory-Tracking

Momona Yamagami, *Member, IEEE*, Lauren N. Peterson, Darrin Howell,  
Eatai Roth, *Member, IEEE* and Samuel A. Burden, *Member, IEEE*

**Abstract**—In human-in-the-loop control systems, operators can learn to manually control dynamic machines with either hand using a combination of reactive (feedback) and predictive (feedforward) control. This paper studies the effect of handedness on learned controllers and performance during a continuous trajectory-tracking task. In an experiment with 18 participants, subjects perform an assay of unimanual trajectory-tracking and disturbance-rejection tasks through second-order machine dynamics, first with one hand then the other. To assess how hand preference (or dominance) affects learned controllers, we extend, validate, and apply a non-parametric modeling method to estimate the concurrent feedback and feedforward elements of subjects' controllers. We find that handedness does not affect the learned controller and that controllers transfer between hands. Observed improvements in time-domain tracking performance may be attributed to adaptation of feedback to reject disturbances arising exogenously (i.e. applied by the experimenter) and endogenously (i.e. generated by sensorimotor noise).

**Index Terms**—feedback, feedforward, hand dominance, human-in-the-loop control systems, sensorimotor learning and control

## I. INTRODUCTION

HUMANS interact with diverse dynamic machines and devices such as computers, quadrotors, and cars in daily life. These interactions give rise to a *human-in-the-loop* control system where the human and the machine jointly accomplish a task through one or more sensorimotor loops. For instance, people learn to steer computer cursors, quadrotor drones, and personal vehicles to track targets or follow desired trajectories primarily by visually observing the machine and providing input through a manual interface like a mouse, joystick, or steering wheel, that is, by using *visuomotor control* [1]–[8]. Such manual interfaces often prescribe *how* we interact with the system; some tasks are performed with one hand, others require coordination between hands, and still others may use either or both hands (e.g., the mouse, joystick, and steering wheel, respectively). Because performance in tasks involving fine motor control is affected by the hand used [9], we seek to understand how human visuomotor control differs between hands. Modeling differences in control between hands could be used to improve bimanual interfaces or to assist unimanual interaction when someone's preferred hand is unavailable due to injury, disease, or circumstance.

M. Yamagami, L. Peterson, and S.A. Burden are with the Department of Electrical and Computer Engineering, University of Washington, Seattle, WA, 98195 USA email: sburden@uw.edu. E. Roth is with the Department of Intelligent Systems Engineering, Indiana University, Bloomington, IN 47401. D. Howell was with the Department of Electrical and Computer Engineering, University of Washington, Seattle, WA, 98195 USA

Colloquially understood as the “differences between the hands in terms of skill” [9], handedness can be quantitatively assessed with questionnaires (e.g. the Edinburgh Handedness Inventory [10] or Annett Handedness Questionnaire [11]) or observed from dexterity tasks [11] when questionnaires are difficult or unreliable to administer (such as for young children). These assessments suggest that about 63% prefer to use the right hand and about 7% prefer to use the left hand [11]. This means that about 70% of people have a *preferred* or *dominant* hand that is more dexterous than the *non-preferred* or *non-dominant* hand. Ongoing research indicates that the observed differences in dexterity between dominant and non-dominant hands may be due to each hemisphere of the brain specializing for different aspects of limb movements (termed *lateralization*) [12]–[14].

Studies in sensorimotor neuroscience suggest that participants learn different sensorimotor skills with their dominant versus non-dominant hand. For instance, when performing a reaching task under the influence of a force field applied by a robotic manipulandum, participants learned to improve final position accuracy for both dominant and non-dominant hands [12]. However, initial movement direction improved only for the participants' dominant hand, which the researchers attribute to changes in predictive (i.e. feedforward) control, whereas the non-dominant hand primarily improved in final error correction, which the researchers attribute to changes in reactive (i.e. feedback) control. These findings suggest that participants rely more on feedforward than feedback control when using their dominant hand, and vice-versa when using their non-dominant hand, for rapid reaching tasks [12], [14]–[16].

For continuous trajectory-tracking and disturbance-rejection tasks through (smooth non)linear machines, prior research primarily focused on modeling participants using their dominant hand [1]–[7], [17]. The results from these experiments support the hypothesis that humans learn to use a combination of feedback and feedforward control to reject disturbances and track references. However, little is known about the differences between controllers learned with different hands and whether learned controllers transfer between hands [8].

The goal of this paper is to determine whether participants learn different feedback or feedforward controllers when using their dominant versus non-dominant hand during a visuomotor trajectory-tracking task. We extend, validate, and apply a nonparametric system identification method to estimate feedback and feedforward controllers using unpredictable reference and disturbance signals and second-order machine dynamics.

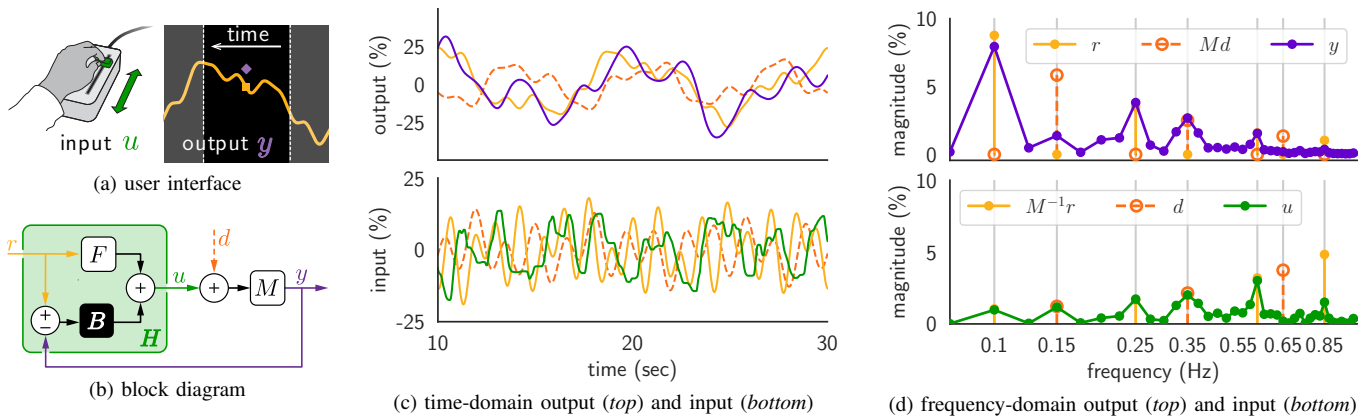

Fig. 1: *Human-in-the-loop trajectory-tracking*. (a) Human response  $u$  is obtained with a one-dimensional manual slider and transformed through machine dynamics to produce output  $y$ , which is overlaid on a display with 1 sec of a reference trajectory (0.5 sec preview). (b) The human  $H$  transforms reference  $r$  and output  $y$  to control  $u$ ; the machine  $M$  transforms the sum of control  $u$  and disturbance  $d$  to output  $y$ . We hypothesize that the human’s transformation is the superposition of a *feedforward*  $F$  response to reference  $r$  and a *feedback*  $B$  response to tracking error  $r - y$ . Representative data from one trial of the **linearity** experiment are shown in (c) the time-domain and (d) the frequency-domain. The frequency content of  $r$  and  $d$  are confined to prime multiples of a base frequency (1/20 Hz). Note that the human input  $u$  has peaks at frequencies where  $r$  or  $d$  are present (peaks in (d) *bottom*), but that the output  $y$  only has peaks corresponding to  $r$ , not  $d$  (peaks and absence of peaks in (d) *top*).

Then we experimentally assess differences in sensorimotor learning between the dominant and non-dominant hand and test whether controllers transfer between hands.

We previously reported preliminary methods and results for first-order machine dynamics in a non-archival conference proceeding [4]; this paper extends those results to a second-order system and provides additional support for the underlying assumptions and hypotheses. More significantly, this paper presents new results comparing learned controllers and performance obtained with dominant and non-dominant hands.

Specifically, we observed two groups as they learned to perform a unimanual trajectory-tracking and disturbance-rejection task. One group started with their dominant right hand before switching to their non-dominant left hand, and vice-versa for the other group. To assess the effect of handedness on learning and transfer, we compared (i) feedback and feedforward controllers and (ii) performance obtained by the two groups with their dominant and non-dominant hands. We demonstrate for the first time that handedness does not affect the learned controller during a continuous trajectory-tracking and disturbance-rejection task. Additionally, we provide evidence that improvements in trajectory-tracking performance may be attributed to changes in feedback gain below the crossover frequency to reject disturbances applied (a) externally by the experimenter, leading to system-level performance improvements only for the group that learned the task with their non-dominant hand first, and (b) internally due to sensorimotor noise.

## II. BACKGROUND

We adopt a tutorial expository style in this section for two reasons. First, to support validation of the assumptions underlying our modeling and analysis methodology, it is important that we explicitly state these assumptions. Second, to support

the application of our methods outside the human-in-the-loop controls community, it is valuable to explicitly provide details and rationale that would ordinarily be taken as ‘given’ in our niche community. The expert reader may wish to skim or skip this section after reviewing the following table of symbols, returning only if questions arise in subsequent sections.

TABLE I: *Table of symbols.*

| symbol             | reference | meaning                                          |
|--------------------|-----------|--------------------------------------------------|
| $u$                | Fig. 1    | human response signal                            |
| $y$                | Fig. 1    | machine output signal                            |
| $r$                | Fig. 1    | reference trajectory signal                      |
| $d$                | Fig. 1    | input disturbance signal                         |
| $M$                | Sec. II-A | machine transformation: $y = M(u + d)$           |
| $H$                | Sec. II-A | human transformation: $u = H(r, y)$              |
| $B$                | Sec. II-A | human feedback controller                        |
| $F$                | Sec. II-A | human feedforward controller                     |
| $T_{zx}$           | Sec. II-B | LTI transformation from $x$ to $z$               |
| $\hat{x}, \hat{T}$ | Sec. II-B | Fourier transform of signal $x$ , LTI system $T$ |

### A. Combined Feedback and Feedforward Improves Prediction

In the laboratory, we instantiate the human-in-the-loop system as a one-degree-of-freedom reference-tracking and disturbance-rejection task (Fig. 1) [2]. When tasked with tracking references  $r$  and rejecting additive disturbances  $d$  through a linear time-invariant (LTI) [18, Ch. 3, pg. 4] system  $M$ , humans learn to behave like an LTI system for a range of reference and disturbance signals [2], [4], [5]. Therefore, the human’s control  $u$  produced in response to reference  $r$  and output  $y$  satisfies the law of superposition,

$$H(r, y) = H(r, 0) + H(0, y). \quad (1)$$

It is conceptually useful to define the human’s *feedback* response  $B$  to output  $y$  in the absence of reference and the

feedforward response  $F$  to reference  $r$  in the absence of output,

$$H(0, y) = -By \quad (2a)$$

$$H(r, 0) = (F + B)r \quad (2b)$$

so that the overall human response can be written as

$$u = H(r, y) = Fr + B(r - y), \quad (3)$$

where  $e = r - y$  is tracking error. Using a combination of feedback and feedforward control to model human reference tracking has a long history in the field [1]–[6], and is a well-known strategy to improve performance over error feedback alone [18, Ch 8]. We emphasize, however, that certain neurologic conditions like cerebellar ataxia could impair users' ability to perform feedforward control; in such cases, feedback alone may provide better predictions [19], [20].

**Hypothesis 1.** *The combined feedback and feedforward model predicts user responses better than a solely feedback model.*

### B. Response to Reference and Disturbance Superimposes

Under Hypothesis 1, the user input  $u$  is related to reference  $r$  and error  $e = r - y$  by (3). However, it is important to note that these two signals are qualitatively different – whereas the reference  $r$  is externally prescribed independently from all other signals, the error  $e$  is implicitly dependent on all other signals through the feedback depicted in Fig. 1. Specifically, substituting  $e = r - y$  and  $y = M(u + d)$  into (3) and solving for  $u$  in terms of the external signals  $r$  and  $d$ , the closed-loop user response  $u$  in Fig. 1b can be expressed as

$$u = \underbrace{\frac{F + B}{1 + BM}}_{T_{ur}} r + \underbrace{\frac{-BM}{1 + BM}}_{T_{ud}} d, \quad (4)$$

where  $T_{ur}$  and  $T_{ud}$  denote the closed-loop transformations relating reference  $r$  and disturbance  $d$  to the user input  $u$  during the trajectory-tracking task.

Signals and LTI systems have time-domain and frequency-domain representations as in Fig. 1(c,d), related by the *Fourier transform* [21, Ch. 5]; we will adorn signal  $x$  and system  $T$  with a “hat”  $\hat{\cdot}$  to denote the Fourier transform  $\hat{x}$ ,  $\hat{T}$ . Importantly in what follows, the frequency-domain operation performed by an LTI system is particularly simple: each frequency component of the input is independently scaled and phase-shifted [18, Ch. 9]. Thus, frequency-domain LTI transformations (termed *transfer functions*) can be empirically estimated by dividing Fourier transforms of time-domain input and output signals at each frequency of interest  $\omega$ ,

$$\hat{T}_{ur}(\omega) = \frac{\hat{u}(\omega)}{\hat{r}(\omega)}, \quad \hat{T}_{ud}(\omega) = \frac{\hat{u}(\omega)}{\hat{d}(\omega)}, \quad (5)$$

and visualized using a *Bode plot* [21, Ch. 5] as in Fig. 4. In contrast, the time-domain operation performed by an LTI system – *convolution* [21, Ch. 3] – is mathematically and computationally more complicated than frequency-domain

multiplication. For this reason, we design and analyze experiments using frequency-domain representations of signals and systems.

**Hypothesis 2.** *The user input for reference tracking with disturbance is consistent with a superposition of the user input to the reference and disturbance signals presented individually.*

### C. Feedback and Feedforward Adapt with Experience

Under Hypothesis 2, we can solve (4) to estimate the feedback  $B$  and feedforward  $F$  components of the human's controller using empirical and prescribed transforms  $\hat{T}_{ud}$ ,  $\hat{T}_{ur}$ ,  $\hat{M}$  at each stimulus frequency  $\omega$  as:

$$\begin{aligned} \hat{B}(\omega) &= \frac{-\hat{T}_{ud}(\omega)}{\hat{M}(\omega)(1 + \hat{T}_{ud}(\omega))}, \quad (6a) \\ \hat{F}(\omega) &= \frac{\hat{T}_{ur}(\omega) + \hat{M}^{-1}(\omega)\hat{T}_{ud}(\omega)}{1 + \hat{T}_{ud}(\omega)} = \frac{\hat{T}_{ur}(\omega)}{1 + \hat{T}_{ud}(\omega)} - \hat{B}(\omega). \quad (6b) \end{aligned}$$

Previous studies on point-to-point reaching tasks suggest that improvements in end-point accuracy can be attributed to improvements in initial movement (feedforward control) for the dominant hand and improvements in error correction (feedback control) for the non-dominant hand [12], [15], [16], possibly due to specialization of each arm and the corresponding brain hemisphere that controls the arm [12]–[14]. These findings lead to the hypothesis that similar effects will be observed in the trajectory-tracking task considered here.

**Hypothesis 3.** *Human feedback and feedforward controllers will adapt with practice. (a) Feedback will adapt when using the non-dominant hand. (b) Feedforward will adapt when using the dominant hand.*

Under Hypothesis 3, we would expect that improvements in tracking will be achieved by adaptation of the feedforward controller when using the dominant hand, and adaptation of the feedback controller when using the non-dominant hand. However, the hypothesis does not speculate about how feedback and feedforward controllers will be adapted nor how the adaptation will affect system-level performance in the trajectory-tracking task.

## III. EXPERIMENTAL METHODS

Two experiments approved by the University of Washington, Seattle's Institutional Review Board (IRB #00000909) were conducted to:

(**linearity**) validate the proposed problem formulation and (**handedness**) assess differences between dominant and non-dominant hands

during sensorimotor learning and control in a continuous trajectory-tracking task.

### A. Manual Interface

Participants used a one-degree-of-freedom manual interface to control the position of a cursor on a screen to track a reference trajectory (Fig. 1a). The interface handle was

attached to a linear potentiometer; the user input  $u$  was determined by measuring the potentiometer voltage using an Arduino Due (Arduino.cc). The linear potentiometer had a 10 cm extent, and trials were designed such that the input required to produce the reference trajectory was restricted to the middle third of this physical extent. The handle geometry changed between the **linearity** and **handedness** experiments to improve ergonomics:

**(linearity)** participants used a  $35 \times 12 \times 22$  mm (width $\times$ height $\times$ depth) rectangular handle;

**(handedness)** participants used a  $35 \times 150$  mm (diameter $\times$ height) cylindrical handle.

### B. Unpredictable Stimuli

Reference and disturbance signals were constructed as a sum of sinusoidal signals with distinct frequencies. Each frequency component's magnitude was normalized by the frequency squared to ensure constant signal power, and the phase of each frequency component was randomized in each trial to produce pseudorandom time-domain signals as in Fig. 2. A similar stimulus design procedure was employed in [5] to produce unpredictable reference and disturbance signals, and in [1] to produce unpredictable disturbance signals. However, to prevent harmonics from confounding user responses at different frequencies, we adopted the procedure from [22] that restricts stimuli frequency components to prime multiples of a base frequency (1/20 Hz in our experiments). Each trial consisted of two periods of the periodic stimuli (40 sec total) after a 5 sec ramp-up. The number of prime multiples changed between the **linearity** and **handedness** experiments to balance the experiment design:

**(linearity)** first seven prime multiples of base frequency;

**(handedness)** first eight prime multiples of base frequency.

### C. Trajectory-Tracking Task

User input  $u$  was transformed through a second-order system with damping to produce output  $y$ :

$$M : \ddot{y} + \dot{y} = u + d, \quad \widehat{M} : \frac{1}{s^2 + s}. \quad (7)$$

In all experiments, 1 second of reference  $r$  was displayed with 0.5 second preview, participants were tasked with adjusting their control input  $u$  to make a cursor positioned at  $y$  track the reference, and the user's input  $u$  was modified by an additive disturbance  $d$  to determine the machine output  $y = M(u + d)$ .

1) **Conditions for Linearity Experiment:** Three different types of conditions were presented to the user in the order shown in TABLE II to test the superposition principle (1), which states that the output produced by a LTI system in response to a sum of inputs ( $r$  and  $d$  in our case) should equal the sum of the outputs produced in response to the individual inputs [18, Ch. 3]. In disturbance-only trials (condition  $(0, d)$ ), where the reference  $r$  was constant (zero) and the disturbance  $d$  was non-constant, we expect user input  $u$  to be produced solely by feedback  $B$ :  $u = H(0, y) = -By$ . In reference-only trials (condition  $(r, 0)$ ), where the reference  $r$  was non-constant and the disturbance  $d$  was zero, we expect user

input  $u$  to be produced by a combination of feedforward  $F$  and feedback  $B$ :  $u = H(r, y) = Fr + B(r - y)$ . In reference-plus-disturbance trials (condition  $(r, d)$ ), where both signals were non-constant, we expect user input to be produced by a combination of feedback and feedforward. However, the frequency components of reference and disturbance were distinct in these trials as in Fig. 2 (bottom) to distinguish the user's response to both signals.

TABLE II: Conditions for **linearity** experiment (cf. Fig. 2).

| Order     | 1        | 2        | 3        | 4        | 5        |
|-----------|----------|----------|----------|----------|----------|
| Condition | $(r, d)$ | $(0, d)$ | $(r, d)$ | $(r, 0)$ | $(r, d)$ |
| # Trials  | 2        | 10       | 2        | 10       | 10       |

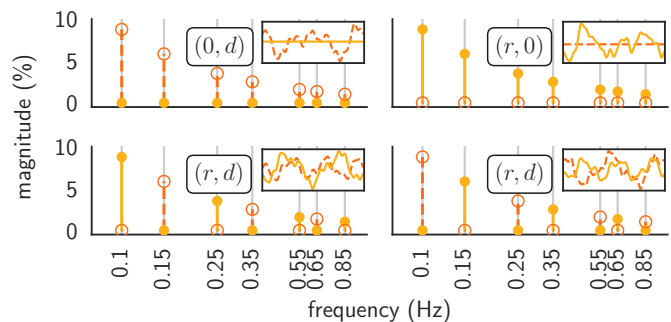

Fig. 2: Conditions for **linearity** experiment (cf. TABLE II). To assess whether the human's response to external reference  $r$  superimposes with the response to external disturbance  $d$ , we empirically estimated transfer functions using data from four experimental conditions: disturbance-only ( $(0, d)$ , upper left); reference-only ( $(r, 0)$ , upper right); reference and disturbance interleaved at different frequencies ( $(r, d)$ , bottom left, right). The magnitude of  $\widehat{r}$  is denoted with solid lines and filled circles, while dashed lines and open circles denote that of  $\widehat{Md}$ ; insets show corresponding time-domain signals  $r, Md$ .

2) **Conditions for Handedness Experiment:** To assess the effects of handedness on feedback and feedforward control, participants were divided into two groups. All participants were right-handed, so we refer to the dominant hand as the "right" hand and the non-dominant hand as the "left" hand. The first group completed 30  $(r, d)$  trials with their dominant right hand, then 30  $(r, d)$  trials with their non-dominant left hand (Group RL). The second group completed the same number of trials, but with their non-dominant left hand first, followed by their dominant right hand (Group LR).

### D. Data Analyses

User input  $u$ , reference  $r$ , disturbance  $d$ , and output  $y$  were sampled at 60 Hz and converted to frequency-domain representations using the fast Fourier transform (FFT). Data were analyzed using Python3.5.

1) **Hypothesis 1:** Feedback  $B$  was estimated for each participant by applying (6a) to data from disturbance-only trials (condition  $(0, d)$ ) and averaging across trials; similarly, feedforward  $F$  was estimated for each participant by applying (6b) to data from reference-only trials (condition  $(r, 0)$ ),

using  $B$  estimated from disturbance-only trials and averaging across trials. These controller estimates were used to predict user input  $u$  by applying (4) to data from disturbance-plus-reference trials (condition  $(r, d)$ ). The coefficient of determination  $R^2$  [23, Sec. 1.3] was used to assess prediction accuracy.

2) **Hypothesis 2:** We computed frequency-domain representations of the transformation from disturbance  $d$  and reference  $r$  to input  $u$  ( $\hat{T}_{ud}$ ,  $\hat{T}_{ur}$ , respectively) at each stimulus frequency using (4). We performed a Wilcoxon signed-rank test with confidence threshold  $\alpha = 0.05$  to assess whether the magnitudes and phases of  $\hat{T}_{ud}$  and  $\hat{T}_{ur}$  from the  $(0, d)$  and  $(r, 0)$  trials were similar to those obtained from the  $(r, d)$  trials. The Wilcoxon signed-rank test is a non-parametric paired t-test for data that is not normally distributed [24, Sec. 5.7], selected here due to the small expected sample size of less than ten participants.

3) **Hypothesis 3:** We assessed the performance of each participant using time-domain tracking error computed as the mean-square error (MSE) between the reference  $r$  and output  $y$  over time  $t$ :

$$\|r - y\|^2 = \sum_{t \in [0, 40]} |r(t) - y(t)|^2. \quad (8)$$

Changes in performance over time were assessed by applying the Wilcoxon signed-rank test with  $\alpha = 0.05$  to the average performance of each individual over the first and last five trials with each hand.

To assess whether a transformation  $T$  changed with practice, we averaged the magnitude of the frequency-domain representation  $\hat{T}$  at stimulus frequencies  $\omega \in \{0.10 \text{ Hz}, 0.15 \text{ Hz}\}$ ,

$$|\hat{T}| = \frac{1}{2} \left( |\hat{T}(0.10 \text{ Hz})| + |\hat{T}(0.15 \text{ Hz})| \right), \quad (9)$$

averaged this quantity over the first and last five trials with each hand for each participant, and applied the Wilcoxon signed-rank test with  $\alpha = 0.05$ . We only included the first two stimulated frequencies in (9) since the other stimulated frequencies exceeded the crossover frequency<sup>1</sup> observed in our population, and prior work indicates (and our results corroborate) that reference-tracking and disturbance-rejection performance degrades at frequencies higher than crossover.

This procedure was applied to the estimated human feedforward  $\hat{F}$  and feedback  $\hat{B}$  transformations, as well as the system-level transformations  $\hat{T}_{yd}$  and  $\hat{T}_{yr} - 1$ . Our focus on the latter two transformations is motivated by the observations that the disturbance is rejected if  $\hat{T}_{yd} = 0$  and the reference is tracked if  $\hat{T}_{yr} = 1$ . However, we note that  $\hat{T}_{yr} = \hat{T}_{yd}(\hat{F} + \hat{B})$  (assuming  $F$  and  $B$  are LTI), so it is not possible for the user to simultaneously achieve  $\hat{T}_{yd} = 0$  and  $\hat{T}_{yr} = 1$  (assuming  $\hat{F}$  and  $\hat{B}$  have finite magnitude).

#### IV. RESULTS

We recruited participants from the greater University of Washington community: 7 for the **linearity** experiment, and an additional 18 (9 male, 9 female; age 18-32; height 145-190 cm; weight 48-98 kg) for the **handedness** experiment.<sup>2</sup>

<sup>1</sup>Frequency where gain of loop transfer function  $\hat{L} = \hat{B}\hat{M}$  equals 1 [2].

<sup>2</sup>Demographics were not recorded for the **linearity** experiment.

The participants had no reported neurological or motor impairments and all were daily computer users.

##### A. Combined Feedback and Feedforward Improves Prediction

We tested Hypothesis 1 with the **linearity** experiment to determine whether a combined feedback-plus-feedforward ( $B + F$ ) model improves prediction compared to a feedback-only ( $B$ ) model (Fig. 3). Predictions for both models were best ( $R^2$  closer to 1) below crossover frequency (0.25 Hz), and decreased in accuracy ( $R^2$  closer to 0) at higher frequencies, suggesting that the linear system models developed are more accurate at lower frequencies. There was no significant difference in prediction accuracy between the  $B$  and  $B + F$  models for any specific frequency ( $p > 0.05$ ). However, when we averaged model  $R^2$  values across all frequencies for each participant, we found that across the participant population,  $B + F$  better predicted user input than  $B$  ( $Z = 354.0, p = 0.01$ ). This finding suggests that user inputs  $u$  in response to references  $r$  and disturbances  $d$  are better predicted with a combined feedback-plus-feedforward ( $B + F$ ) model than a feedback-only ( $B$ ) model.

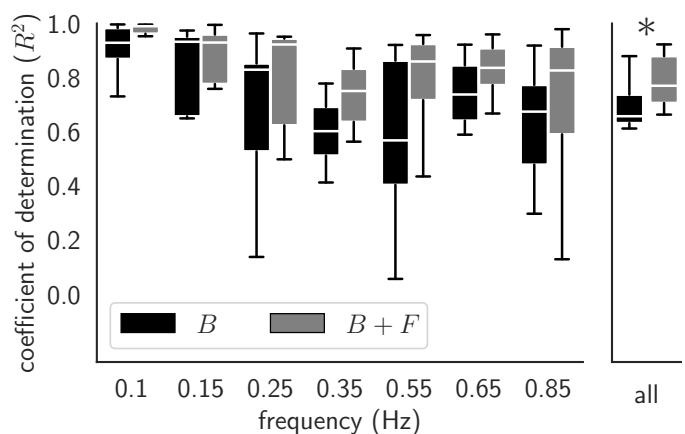

Fig. 3: *Predictive accuracy of models, linearity experiment.* Distribution (median, interquartile) of coefficient of determination ( $R^2$ ) between human inputs  $u$  and predictions from feedback-only ( $B$ ) and feedback-plus-feedforward ( $B + F$ ) models. There was no significant difference between the  $B$  and  $B + F$  model prediction accuracy at any specific frequency ( $p > 0.05$ ), but the average  $R^2$  values across all frequencies was significantly higher for the  $B + F$  model than the  $B$  model ( $Z = 0.0, p = 0.02$ ; indicated with \*).

##### B. Response to Reference and Disturbance Superimposes

We tested Hypothesis 2 with the **linearity** experiment to determine whether user input  $u$  in response to disturbance-only  $(0, d)$  or reference-only  $(r, 0)$  conditions was consistent with user input in response to disturbance-plus-reference conditions  $(r, d)$  (Fig. 4). The magnitude and phase of the transfer functions from  $d$  and  $r$  to  $u$  ( $\hat{T}_{ud}$  and  $\hat{T}_{ur}$ , respectively) estimated from these different conditions were indistinguishable at most stimulus frequencies ( $p > 0.05$ ; exceptions denoted with †

in Fig. 4), indicating that participants' response to reference and disturbance signals approximately satisfied the law of superposition.

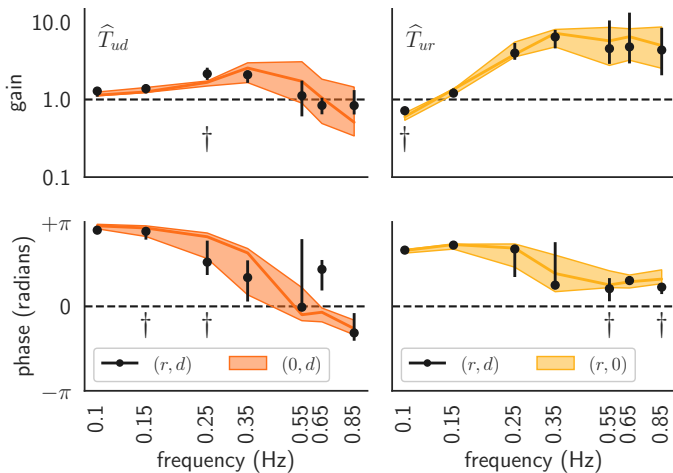

Fig. 4: *Transfer function estimates in linearity experiment.* Distributions (median, interquartile) of transfer functions  $\hat{T}_{ud}$  (left),  $\hat{T}_{ur}$  (right) estimated from disturbance-only or reference-only trials,  $(0,d)$  or  $(r,0)$ , and reference-plus-disturbance trials  $(r,d)$ , for the conditions in TABLE II and Fig. 2. Statistically significant differences ( $p < 0.05$ ) in distribution magnitude or phase at each frequency indicated with  $\dagger$ .

### C. Feedback and Feedforward Adapt with Experience

We tested Hypothesis 3 with the **handedness** experiment (Fig. 5 and Fig. 6).

We assessed whether task performance changed with practice using time-domain reference tracking error  $\|r - y\|^2$  from (8), finding that performance improved rapidly within the first five trials and then did not change significantly, even after switching hands, regardless of which hand was used first (Fig. 6a). Performance improved significantly between the first and last five trials with the first hand (trials #1–5 and #26–30; Group RL:  $Z = 0.00$ ,  $p = 0.007$ ; Group LR:  $Z = 0.00$ ,  $p = 0.007$ ), and did not change significantly between the last five trials with the first hand and the first five trials of the second hand (trials #26–30 and #31–35; Group RL:  $Z = 21.0$ ,  $p = 0.86$ ; Group LR:  $Z = 19.0$ ,  $p = 0.68$ ).

To determine whether improvements in  $\|r - y\|^2$  could be attributed to changes in feedforward or feedback control, we assessed whether feedback  $B$  or feedforward  $F$  control changed with practice using the mean magnitude of the frequency-domain representation  $|\hat{B}|$  or  $|\hat{F}|$  from (9). The mean magnitude of the feedback controller increased with practice for both groups ( $Z = 3.0$ ,  $p = 0.02$  in both) between the first and last five trials with the first hand, and did not change when switching to the second hand ( $p > 0.05$ ). There was no change in the mean magnitude of the feedforward controller across all conditions ( $p > 0.05$ ) (Fig. 7).

We observed system-level performance improvements at the first two stimulated frequencies (0.10, 0.15 Hz) solely for

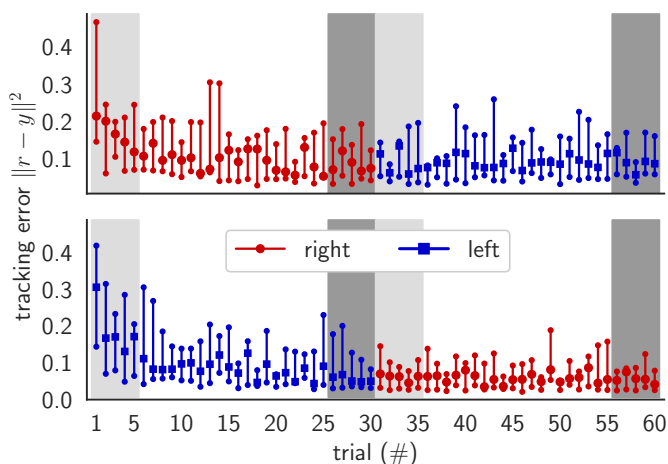

Fig. 5: *Tracking error from handedness experiment.* Distributions (median, interquartile) of time-domain tracking error  $\|r - y\|^2$  for 60 trials, with a switch between dominant (right; red circles) and non-dominant (left; blue squares) hands after trial 30, for two groups of 9 participants: (top) right then left (Group RL); (bottom) left then right (Group LR). Summary statistics in Fig. 6 use data from first five and last five trials with each hand, highlighted with light and dark gray boxes.

Group LR (Fig. 6). Group LR significantly decreased both  $|\hat{T}_{yr} - 1|$  ( $Z = 4.0$ ,  $p = 0.028$ ) and  $|\hat{T}_{yd}|$  ( $Z = 0.0$ ,  $p = 0.007$ ) through experience with their first (left) hand, indicating significant improvements in reference tracking and disturbance rejection. This improved performance persisted even after switching from the left hand to the right hand, suggesting some transfer of knowledge between hands.

Although we saw significant improvements in tracking performance with practice, we only observed modest or no improvements in system-level performance at stimulated frequencies. These results led us to consider user response at non-stimulated frequencies, since any such response degrades tracking performance. For both user groups, the magnitude of the user response at non-stimulus frequencies below crossover (0.25 Hz) decreased significantly between the first and last five trials with the first hand (trials #1–5 and #25–30) (Fig. 8). This attenuated response transferred between hands.

## V. DISCUSSION

Prior work demonstrated that people adapt feedback and feedforward controllers differently with the dominant and non-dominant hands during rapid reaching tasks [12], [14]–[16]. However, little is known about how handedness affects learned controllers in continuous trajectory-tracking tasks such as the one considered in this study. When subjects reach to targets, feedback and feedforward control are assumed to be episodic: the initial ballistic motion is attributed to solely feedforward control (since sensorimotor delays preclude feedback) whereas corrective motions in the latter stage of the reach are attributed to solely feedback control [12], [14]–[16]. In contrast, feedback and feedforward processes are engaged simultaneously when subjects track continuous trajectories as in our experiments.

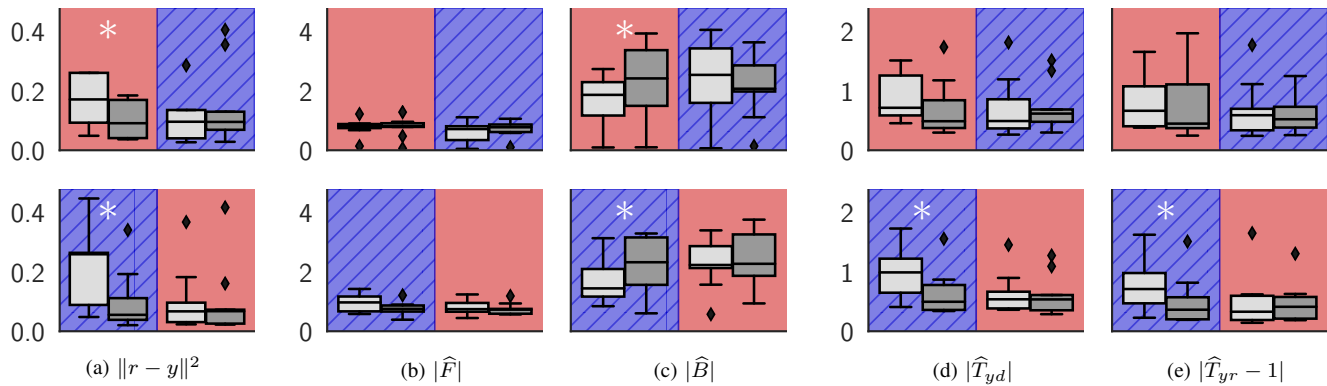

Fig. 6: *Summary statistics from handedness experiment.* Distributions (median, interquartile) from first five (light gray box) and last five (dark gray box) of 30 trials with dominant (red solid background) and non-dominant (blue hatched background) hands: (a) tracking error  $\|r - y\|^2$ ; mean magnitude of (b) feedforward  $|\hat{F}|$  and (c) feedback  $|\hat{B}|$  controllers (shared  $y$  axis); mean magnitude of (d) disturbance rejection  $|\hat{T}_{yd}|$  and (e) reference tracking  $|\hat{T}_{yr} - 1|$  errors (shared  $y$  axis). Statistically significant ( $p < 0.05$ ) differences between adjacent distributions indicated with \*. Group RL in top row, Group LR in bottom row, as in Fig. 5.

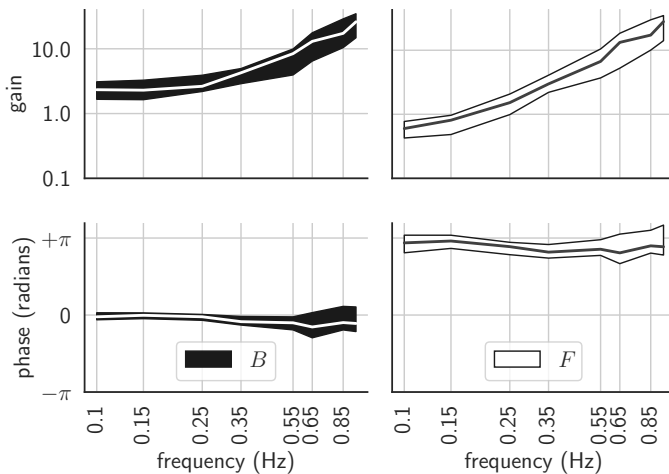

Fig. 7: *Human feedback ( $B$ ) and feedforward ( $F$ ) controllers.* Distributions (median, interquartile) obtained by pooling data from the last five trials with each hand for both groups in the **handedness** experiment; we did not observe statistically significant differences between groups or hands.

To assess how feedback and feedforward controllers are learned through experience and transferred between hands in a trajectory-tracking task, we extend, validate, and apply a non-parametric system identification method (adapted from [2], [4], [5], [7]). We find that feedback and feedforward controllers estimated for different hands are not distinguishable and that learned controllers transfer between hands. Trajectory-tracking performance improves significantly with practice, but system-level performance improvements are significant only for the group that learned the trajectory-tracking task with their non-dominant hand first. Surprisingly, we do not find significant adaptation of the feedforward controller across the sample population. Instead, performance improvements can be attributed to a significant increase in feedback gain below

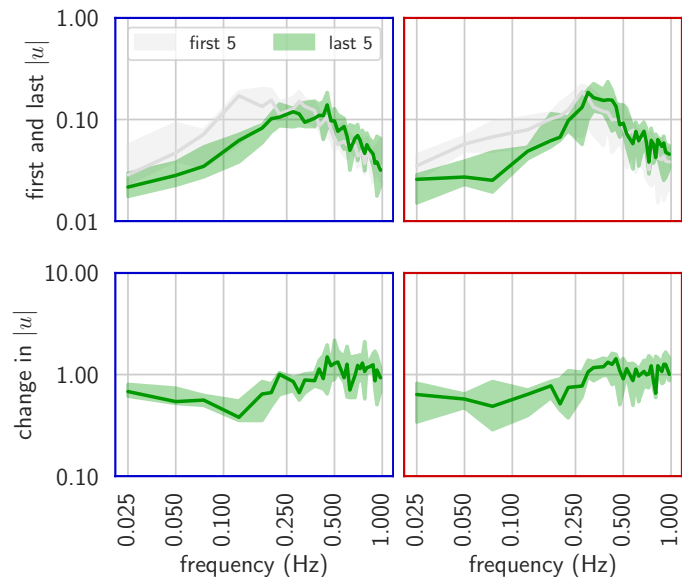

Fig. 8: *Change in effect of sensorimotor noise.* (top row:) Distributions (median, interquartile) of magnitude of user response at non-stimulated frequencies from first and last five trials with first hand (trials #1–5 in light gray and #26–30 in green) in **handedness** experiment. (bottom row:) Ratio of user response magnitudes between first and last five trials with first hand decreases significantly below crossover (0.25 Hz). Group LR on left, Group RL on right.

crossover frequency; this accounts for significant changes in the effect of disturbances applied both externally by the experimenter and internally by sensorimotor noise.

#### A. Combined Feedback and Feedforward Improved Prediction

Our results suggest that participants use both feedback and feedforward control to continuously track reference trajectories and reject disturbances, consistent with previous results for

first-order [1], [4], [5], [7] and fourth-order [6], [25] systems, lending further support for Hypothesis 1.

Our system identification method assumes the human controller consists of parallel feedback and feedforward controllers. However, the method does not assume or require either controller to be non-zero; in particular, if participants did not employ feedforward control, our method would yield a feedforward estimate with negligible magnitude. We emphasize that including *both* reference-tracking *and* disturbance-rejection in the task is necessary to ensure we can solve two independent equations in two unknowns (6) to uniquely determine feedback and feedforward controllers.

### B. Response to Reference and Disturbance (Approximately Superimposes)

We found small but statistically significant differences between the transformations  $T_{ud}$ ,  $T_{ur}$  estimated using data from disturbance-only  $(0, d)$  and reference-only  $(r, 0)$  trials and the combined reference-and-disturbance  $(r, d)$  trials. Thus, the controllers implemented by our participants to control a second-order system do not satisfy the superposition principle (1), in contrast to our previous findings for first-order systems [4]; we attribute this difference to the increased difficulty of the trajectory-tracking task for a second-order system. Similarly to our previous findings for first-order systems [4], we found higher variability in transformation estimates at higher frequencies compared to lower frequencies. Although we found evidence that our human-in-the-loop control system is mildly nonlinear, neglecting this nonlinearity nevertheless yields good predictions for the human's learned controllers, so our results support Hypothesis 2 with caveats.

Although human behavior is richly varied and nonlinear in general, people can behave remarkably linearly after sufficient experience interacting in closed-loop with a linear time-invariant system [1], [4]–[7], [25], [26]. Previous studies have ensured that human-in-the-loop-systems are approximately linear by using experts such as pilots [2] or only collecting data after participants undergo practice [1], [25]. Because our experiments commenced immediately without providing time for participants to explore the interface or machine dynamics (let alone become experts), this lack of practice may have contributed to the mild nonlinearities we observed. Future studies may benefit from explicit estimation of nonlinearity [26], especially during learning.

### C. Feedback Adapted With Experience; Feedforward Did Not

Regardless of which hand was used first, participants significantly improved tracking performance through experience with their first hand. This improvement in time-domain performance persisted when participants switched hands, suggesting that learned controllers transferred between hands. Since we observed corresponding significant increases in feedback gain and observed no significant change in feedforward, we attribute this performance improvement to changes in feedback. These findings lead us to *reject* Hypothesis 3.

Our Hypothesis 3 was motivated by previous studies of human sensorimotor learning during reaching tasks that suggest improvements in end-point precision were due to improvements in initial movement (feedforward control) for the dominant (right) hand and improvements in error correction (feedback control) for the non-dominant (left) hand [12], [14]–[16]. However, there are differences between target-reaching tasks and the trajectory-tracking task used in this current experiment. For instance, the target-reaching tasks in [12], [14]–[16] are brief (approximately 1 sec in duration), so feedforward control is thought to dominate user response for a significant fraction of each trial since visual feedback is delayed by approximately 250 msec, and the target's location changes discontinuously when the trial begins. In contrast, feedback and feedforward are engaged simultaneously for the entire 40 sec duration of each of our trajectory-tracking trials, and the reference changes continuously throughout the trial. Additionally, target-reaching tasks involve arm motions that are large relative to the 10 cm extent of our manual interface. These differences in experiment design could account for the differences we observed in how feedback and feedforward adapt. Since increasing the difficulty of a target-reaching task affects adaptation of feedback and feedforward [27], [28], it is possible that changing the machine dynamics or user interface may affect adaptation of feedback and feedforward in trajectory-tracking tasks.

Our finding that feedforward control did not adapt with practice is inconsistent with previously published research that demonstrated adaptation of feedforward control over a 2-week period [6]. There are significant differences between our study methodology and [6] that may explain why we did not observe feedforward adaptation. First, the participants in [6] were tasked with learning to track a fourth-order system, which is significantly more complex than the second-order system used here. Since many of our participants reported prior experience controlling second-order systems (e.g. driving cars, playing video games), they may have employed a previously-learned feedforward controller in our experiment. There was also a significant difference in practice time between the two studies. In [6], participants learned the system dynamics over two weeks, whereas in our study, participants learned the system dynamics over 30 minutes. Although we observed performance plateau during the 30-minute study, a longer practice time over the course of days or weeks may result in significant adaptation of feedforward control.

### D. Adaptation of Feedback Improved System-Level Performance For Group LR but Not Group RL

To determine whether adaptations in feedback controller gain lead to system-level improvements in performance, we looked for differences in  $\hat{T}_{yd}$ ,  $\hat{T}_{yr}$  at the first two stimulated frequencies (0.10, 0.15 Hz) comparing the first five and last five trials with each hand. For Group LR, we saw improvements in both  $\hat{T}_{yd}$  and  $\hat{T}_{yr}$  with their first hand, suggesting that reference tracking and disturbance rejection both improved. Despite clear improvements in time-domain performance, we did not observe corresponding improvements in system-level performance at the stimulated frequencies for Group RL.



Sample size may explain some observed system-level differences in how groups improved performance. Group LR and Group RL were relatively small populations (9 participants in each group), so there may have been unmeasured group-level differences. For instance, participants reported subjective differences in the strategy they employed to improve tracking performance. Some participants acknowledged that they were controlling the cursor acceleration and consciously altered their response accordingly, while others mainly focused on reactively minimizing tracking error. Future experiments with a larger number of participants are needed to determine whether different subpopulations employ different strategies when learning controllers.

#### *E. Adaptation of Feedback Affected the Effect (but not the Source) of Sensorimotor Noise*

Since time-domain tracking performance improved significantly for both groups of participants but rejection of disturbance stimuli and tracking of reference stimuli only improved for one group, we are led to consider user response at frequencies we measured but did not stimulate. Any user response at non-stimulated frequencies degrades time-domain tracking performance, so it is in the users' best interest to suppress this response. We observed nonzero user response at non-stimulated frequencies, and this response decreased significantly with practice for frequencies below crossover for the first hand in both groups (Fig. 8). Because the machine dynamics and feedback in Fig. 1b are linear time-invariant, the user response at non-stimulated frequencies arises due to (i) nonlinearity in the human's transformation and/or (ii) sensorimotor noise. Although we found evidence for (i) mild nonlinearities (see Fig. 4 and Sec. V-B), we tested for but did not find significant harmonics in the user response at non-prime multiples of base frequency (i.e. non-stimulated frequencies), so nonlinearity alone does not appear to explain our observations. Assuming instead that user response at non-stimulated frequencies arises solely due to (ii) additive sensorimotor noise, we found that this noise did not change with experience. Instead, the *effect* of the noise is attenuated by the increase in feedback gain below crossover. Indeed, despite the fact that we observed significant changes in feedback  $B$  and user response  $u$  at non-stimulated frequencies, we observed no significant changes in the power spectrum of the imputed disturbance  $\delta = (1 + MB)u$ . This result is consistent with prior studies from sensorimotor control that found the presence of significant noise whose statistics did not change with the limited amount of practice (less than 1 hour) considered here [29].

#### *F. Does Stimulus or Noise Drive Learning?*

When learning to perform novel tasks like controlling a cursor on a screen or reaching under a force field, sensorimotor noise and movement variability are crucial for driving learning [30]–[32]. As people explore the action space for a particular task, certain movements (e.g. tracking a trajectory with specific frequency components) result in greater reward (e.g. improved tracking) [30]. With significant practice, noise

and variability decreases, leading to improved performance in ballistic throwing [29], [33] and reaching [32] tasks. Similarly, we argue here that the improvement in time-domain performance without improvement in system-level performance at stimulated signals, in addition to the decrease in user response at non-stimulated frequencies below crossover, suggests that reducing the effect of sensorimotor noise may be a crucial aspect of performance improvement in continuous trajectory-tracking tasks (regardless of whether the source of the noise can be affected). Although out of scope for our study, our results indicate that in addition to examining feedback and feedforward control at stimulated frequencies, changes in feedback control and sensorimotor noise at non-stimulated frequencies should also be considered during continuous trajectory-tracking tasks to better model and enhance the performance of human-in-the-loop control systems.

## VI. CONCLUSION

Understanding how humans learn to track continuous trajectories with their dominant and non-dominant hands is crucial for enabling bimanual device control like teleoperating a surgical robot or manipulating objects in augmented or virtual reality. We first validated a non-parametric modeling method to simultaneously estimate feedback and feedforward control during a second-order continuous trajectory-tracking and disturbance-rejection task with seven participants. We then investigated adaptation of feedback and feedforward control and corresponding system-level changes in performance when nine participants learned to track with their right hand before their left hand, and when nine other participants learned to track with their left hand before their right hand.

Our study demonstrated that: (1) feedback control adapted with practice and transferred between hands, whereas feedforward control did not adapt; (2) feedback adaptation improved system-level performance in tracking prescribed references and rejecting externally-applied disturbances only for the group that first learned the task with their left hand; and (3) feedback adaptation improved tracking performance by attenuating the effect of a user's sensorimotor noise in both groups. These findings suggest that handedness may not affect learned controllers, demonstrate that learned controllers may be transferred between hands, and highlight the importance of attenuating sensorimotor noise for human-in-the-loop control systems.

## ACKNOWLEDGMENTS

We would like to thank our participants for sharing their time with us. This research was funded by the University of Washington Institute of Neuroengineering, the Amplifying Motion and Performance (AMP) Lab at the University of Washington, and the National Science Foundation Cyber-Physical Systems Program (Award #1836819).

## REFERENCES

- [1] F. M. Drop, D. M. Pool, H. J. Damveld, M. M. van Paassen, and M. Mulder, "Identification of the feedforward component in manual control with predictable target signals," *IEEE Transactions on Cybernetics*, vol. 43, no. 6, pp. 1936–1949, 2013.

- [2] D. T. McRuer and H. R. Jex, "A review of quasi-linear pilot models," *IEEE Transactions on Human Factors in Electronics*, no. 3, pp. 231–249, 1967.
- [3] E. Roth, D. Howell, C. Beckwith, and S. A. Burden, "Toward experimental validation of a model for human sensorimotor learning and control in teleoperation," in *Micro-and Nanotechnology Sensors, Systems, and Applications IX*, vol. 10194. International Society for Optics and Photonics, 2017.
- [4] M. Yamagami, D. Howell, E. Roth, and S. A. Burden, "Contributions of feedforward and feedback control in a manual trajectory-tracking task," in *Proceedings of the IFAC Conference on Cyber-Physical-Human Systems (CPHS)*, vol. 51, no. 34. Elsevier, 2018, pp. 61–66.
- [5] B. Yu, R. B. Gillespie, J. S. Freudenberg, and J. A. Cook, "Human control strategies in pursuit tracking with a disturbance input," in *IEEE Conference on Decision and Control (CDC)*, 2014, pp. 3795–3800.
- [6] X. Zhang, S. Wang, J. B. Hoagg, and T. M. Seigler, "The roles of feedback and feedforward as humans learn to control unknown dynamic systems," *IEEE Transactions on Cybernetics*, vol. 48, no. 2, pp. 543–555, 2017.
- [7] M. Yamagami, K. M. Steele, and S. A. Burden, "Decoding intent with control theory: comparing muscle versus manual interface performance," in *Proceedings of the ACM Conference on Human Factors in Computing Systems (CHI)*, 2020, pp. 1–12.
- [8] M. Mulder, D. M. Pool, D. A. Abbink, E. R. Boer, P. M. Zaal, F. M. Drop, K. van der El, and M. M. van Paassen, "Manual control cybernetics: state-of-the-art and current trends," *IEEE Transactions on Human-Machine Systems*, vol. 48, no. 5, pp. 468–485, 2017.
- [9] K. Flowers, "Handedness and controlled movement," *British Journal of Psychology*, vol. 66, no. 1, pp. 39–52, 1975.
- [10] R. C. Oldfield *et al.*, "The assessment and analysis of handedness: the Edinburgh inventory," *Neuropsychologia*, vol. 9, no. 1, pp. 97–113, 1971.
- [11] D. Kilshaw and M. Annett, "Right-and left-hand skill I: Effects of age, sex and hand preference showing superior skill in left-handers," *British Journal of Psychology*, vol. 74, no. 2, pp. 253–268, 1983.
- [12] S. V. Duff and R. L. Sainburg, "Lateralization of motor adaptation reveals independence in control of trajectory and steady-state position," *Experimental Brain Research*, vol. 179, no. 4, pp. 551–561, 2007.
- [13] R. S. Johansson, A. Theorin, G. Westling, M. Andersson, Y. Ohki, and L. Nyberg, "How a lateralized brain supports symmetrical bimanual tasks," *PLoS Biology*, vol. 4, no. 6, p. e158, 2006.
- [14] R. L. Sainburg and D. Kalakanis, "Differences in control of limb dynamics during dominant and nondominant arm reaching," *Journal of Neurophysiology*, vol. 83, no. 5, pp. 2661–2675, 2000.
- [15] L. B. Bagesteiro and R. L. Sainburg, "Handedness: dominant arm advantages in control of limb dynamics," *Journal of Neurophysiology*, vol. 88, no. 5, pp. 2408–2421, 2002.
- [16] C. N. Schabowsky, J. M. Hidler, and P. S. Lum, "Greater reliance on impedance control in the nondominant arm compared with the dominant arm when adapting to a novel dynamic environment," *Experimental Brain Research*, vol. 182, no. 4, pp. 567–577, 2007.
- [17] K. van der El, S. Padmos, D. M. Pool, M. M. van Paassen, and M. Mulder, "Effects of preview time in manual tracking tasks," *IEEE Transactions on Human-Machine Systems*, vol. 48, no. 5, pp. 486–495, 2018.
- [18] K. J. Aström and R. M. Murray, *Feedback systems: an introduction for scientists and engineers*. Princeton university press, 2010.
- [19] M. A. Smith and R. Shadmehr, "Intact ability to learn internal models of arm dynamics in Huntington's disease but not cerebellar degeneration," *Journal of Neurophysiology*, vol. 93, no. 5, pp. 2809–2821, 2005.
- [20] A. M. Zimet, A. J. Bastian, and N. J. Cowan, "Cerebellar patients have intact feedback control that can be leveraged to improve reaching," *eLife*, In revision, pending revision; preprint on bioRxiv.
- [21] C. L. Phillips, J. M. Parr, and E. A. Riskin, *Signals, systems, and transforms*. Prentice Hall Upper Saddle River, 2003.
- [22] E. Roth, K. Zhuang, S. A. Stamper, E. S. Fortune, and N. J. Cowan, "Stimulus predictability mediates a switch in locomotor smooth pursuit performance for *Eigenmannia virescens*," *The Journal of Experimental Biology*, vol. 214, no. 7, pp. 1170–1180, 2011.
- [23] N. R. Draper and H. Smith, *Applied Regression Analysis*. John Wiley & Sons, 1998.
- [24] W. J. Conover, *Practical nonparametric statistics*. Wiley, 1999.
- [25] R. B. Warrior and S. Devasia, "Inferring intent for novice human-in-the-loop iterative learning control," *IEEE Transactions on Control Systems Technology*, vol. 25, no. 5, pp. 1698–1710, 2016.
- [26] S. E. Wagenaar, D. M. Pool, H. J. Damveld, M. M. van Paassen, and M. Mulder, "Estimation of nonlinear contributions in human controller frequency response functions," in *IEEE International Conference on Systems, Man, and Cybernetics (SMC)*, 2018, pp. 3434–3439.
- [27] R. Seidler, D. Noll, and G. Thiers, "Feedforward and feedback processes in motor control," *Neuroimage*, vol. 22, no. 4, pp. 1775–1783, 2004.
- [28] C. J. Winstein, S. T. Grafton, and P. S. Pohl, "Motor task difficulty and brain activity: investigation of goal-directed reciprocal aiming using positron emission tomography," *Journal of Neurophysiology*, vol. 77, no. 3, pp. 1581–1594, 1997.
- [29] M. E. Huber, N. Kuznetsov, and D. Sternad, "Persistence of reduced neuromotor noise in long-term motor skill learning," *Journal of Neurophysiology*, vol. 116, no. 6, pp. 2922–2935, 2016.
- [30] A. K. Dhawale, M. A. Smith, and B. P. Ölveczky, "The role of variability in motor learning," *Annual Review of Neuroscience*, vol. 40, pp. 479–498, 2017.
- [31] D. J. Herzfeld and R. Shadmehr, "Motor variability is not noise, but grit for the learning mill," *Nature Neuroscience*, vol. 17, no. 2, pp. 149–150, 2014.
- [32] H. G. Wu, Y. R. Miyamoto, L. N. G. Castro, B. P. Ölveczky, and M. A. Smith, "Temporal structure of motor variability is dynamically regulated and predicts motor learning ability," *Nature Neuroscience*, vol. 17, no. 2, pp. 312–321, 2014.
- [33] C. J. Hasson, Z. Zhang, M. O. Abe, and D. Sternad, "Neuromotor noise is malleable by amplifying perceived errors," *PLoS Computational Biology*, vol. 12, no. 8, p. e1005044, 2016.
